# Supplementary material for: Ferrimagnetic and relaxor ferroelectric properties of R2MnMn(MnTi3)O12 perovskites with R = Nd, Eu, and Gd
Source: Royal Society of Chemistry journal article supplement (doi:10.1039/d0tc04463f), 2020-12-10
Supplement: d0tc04463f1.pdf [file d0tc04463f1.pdf]

## Supporting Information (Online Material) for

### Ferrimagnetic and relaxor ferroelectric properties of $R_2MnMn(MnTi_3)O_{12}$ perovskites with R = Nd, Eu, and Gd

Ran Liu,<sup>a,b</sup> Masahiko Tanaka,<sup>c</sup> Hiromu Mori,<sup>d</sup> Yoshiyuki Inaguma,<sup>d</sup> Kazunari Yamaura<sup>a,b</sup>  
and Alexei A. Belik<sup>\*a</sup>

<sup>a</sup> *International Center for Materials Nanoarchitectonics (WPI-MANA), National Institute for Materials Science (NIMS), Namiki 1-1, Tsukuba, Ibaraki 305-0044, Japan. E-mail: Alexei.Belik@nims.go.jp*

<sup>b</sup> *Graduate School of Chemical Sciences and Engineering, Hokkaido University, North 10 West 8, Kita-ku, Sapporo, Hokkaido 060-0810, Japan*

<sup>c</sup> *Synchrotron X-ray Station at SPring-8, NIMS, Kouto 1-1-1, Sayo-cho, Hyogo 679-5148, Japan*

<sup>d</sup> *Department of Chemistry, Faculty of Science, Gakushuin University, 1-5-1 Mejiro, Toshima-ku, Tokyo 171-8588, Japan*

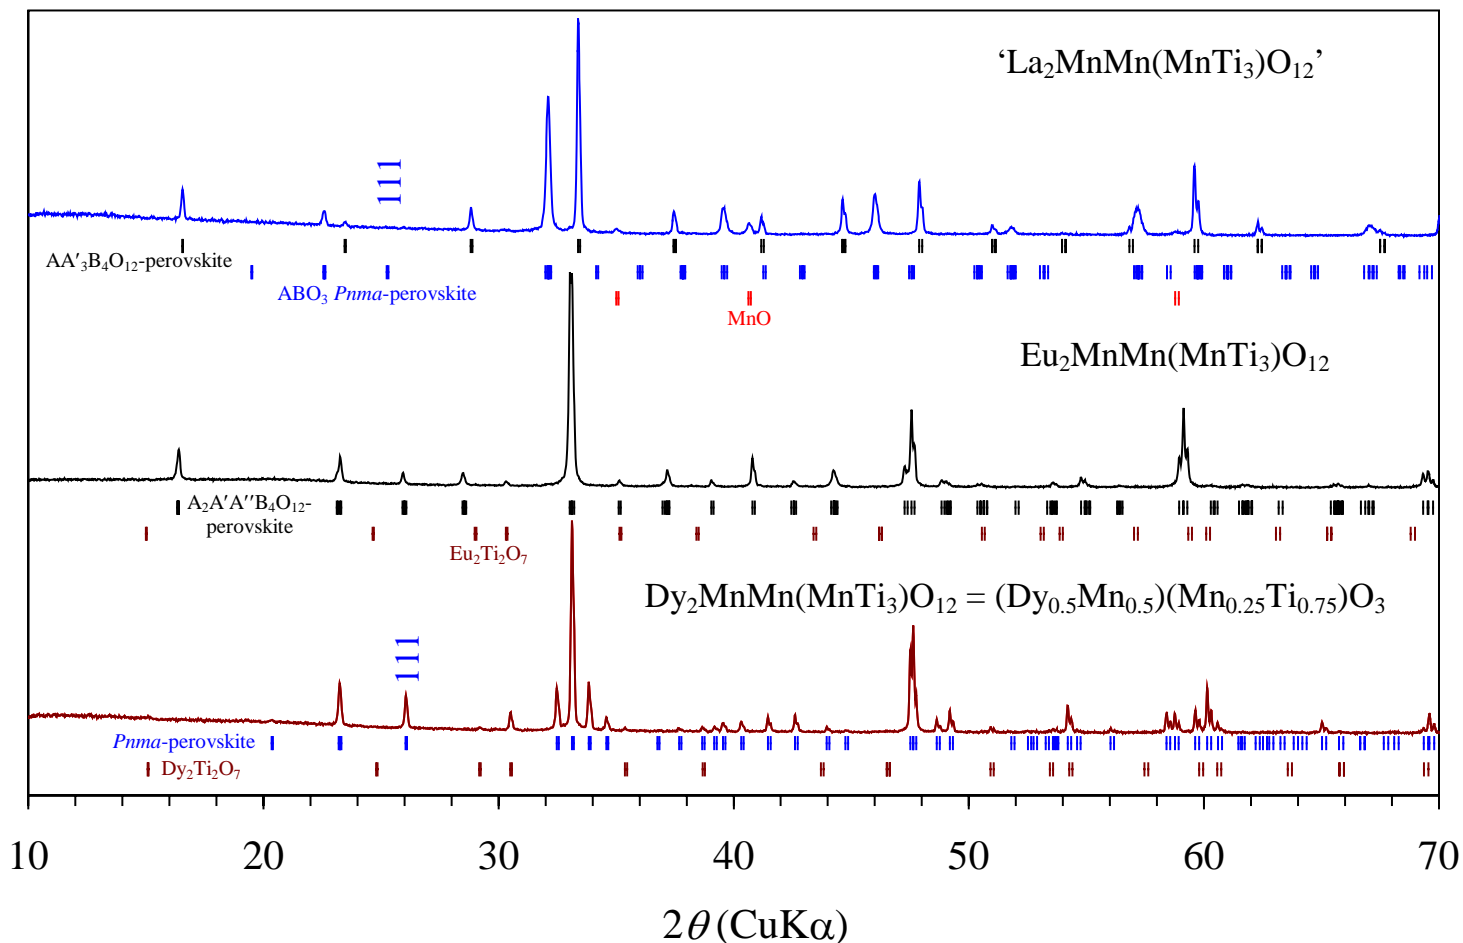

**Fig. S1.** Laboratory powder X-ray diffraction patterns at room temperature for (upper) a sample with the total chemical composition of  $\text{La}_2\text{MnMn}(\text{MnTi}_3)\text{O}_{12}$ , (middle)  $\text{Eu}_2\text{MnMn}(\text{MnTi}_3)\text{O}_{12}$  and (bottom)  $\text{Dy}_2\text{MnMn}(\text{MnTi}_3)\text{O}_{12}$ . Tick marks show possible Bragg reflection positions for phases indicated on the figure.

Note the  $\text{ABO}_3$ -type phase in  $\text{La}_2\text{MnMn}(\text{MnTi}_3)\text{O}_{12}$  was described by the  $\text{GdFeO}_3$   $Pnma$  model. However, because of the absence of the (111) peak, which is usually observed in the  $\text{GdFeO}_3$   $Pnma$  model, the real symmetry of the  $\text{ABO}_3$ -type phase might be different.

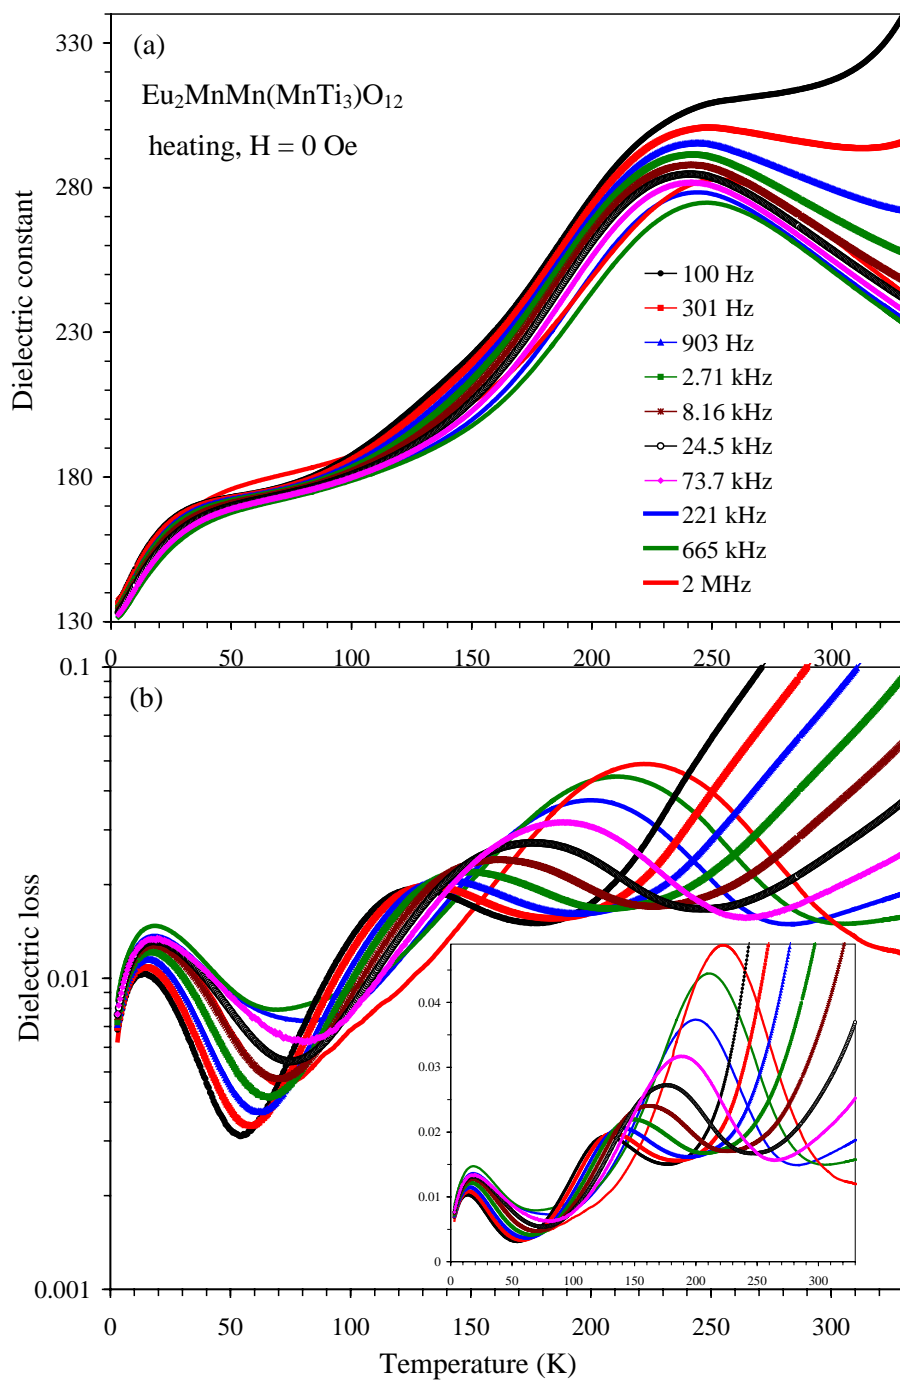

**Fig. S2.** (a) Frequency-dependent ( $f = 100$  Hz - 2 MHz) dielectric constant of  $\text{Eu}_2\text{MnMn}(\text{MnTi}_3)\text{O}_{12}$  as a function of temperature measured at  $H = 0$  Oe on heating. (b) The corresponding frequency-dependent dielectric loss of  $\text{Eu}_2\text{MnMn}(\text{MnTi}_3)\text{O}_{12}$ , plotted in the logarithmic scale. Inset gives the same dielectric loss in the linear scale.

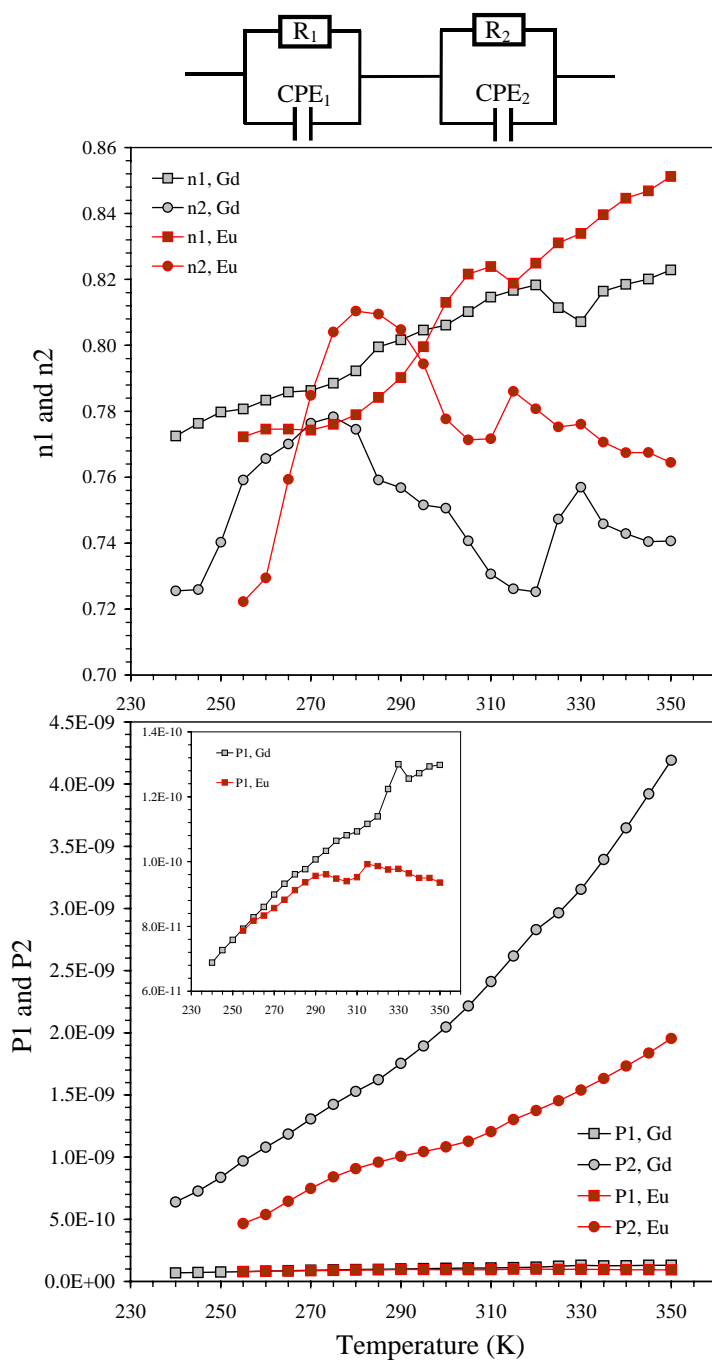

**Fig. S3.** Temperature dependence of the fitting parameters for constant phase elements obtained from the impedance measurements for  $\text{Eu}_2\text{MnMn}(\text{MnTi}_3)\text{O}_{12}$  and  $\text{Gd}_2\text{MnMn}(\text{MnTi}_3)\text{O}_{12}$ . The equivalent circuit used for the fittings is shown on the top. R: a resistor, CPE: a constant phase element.

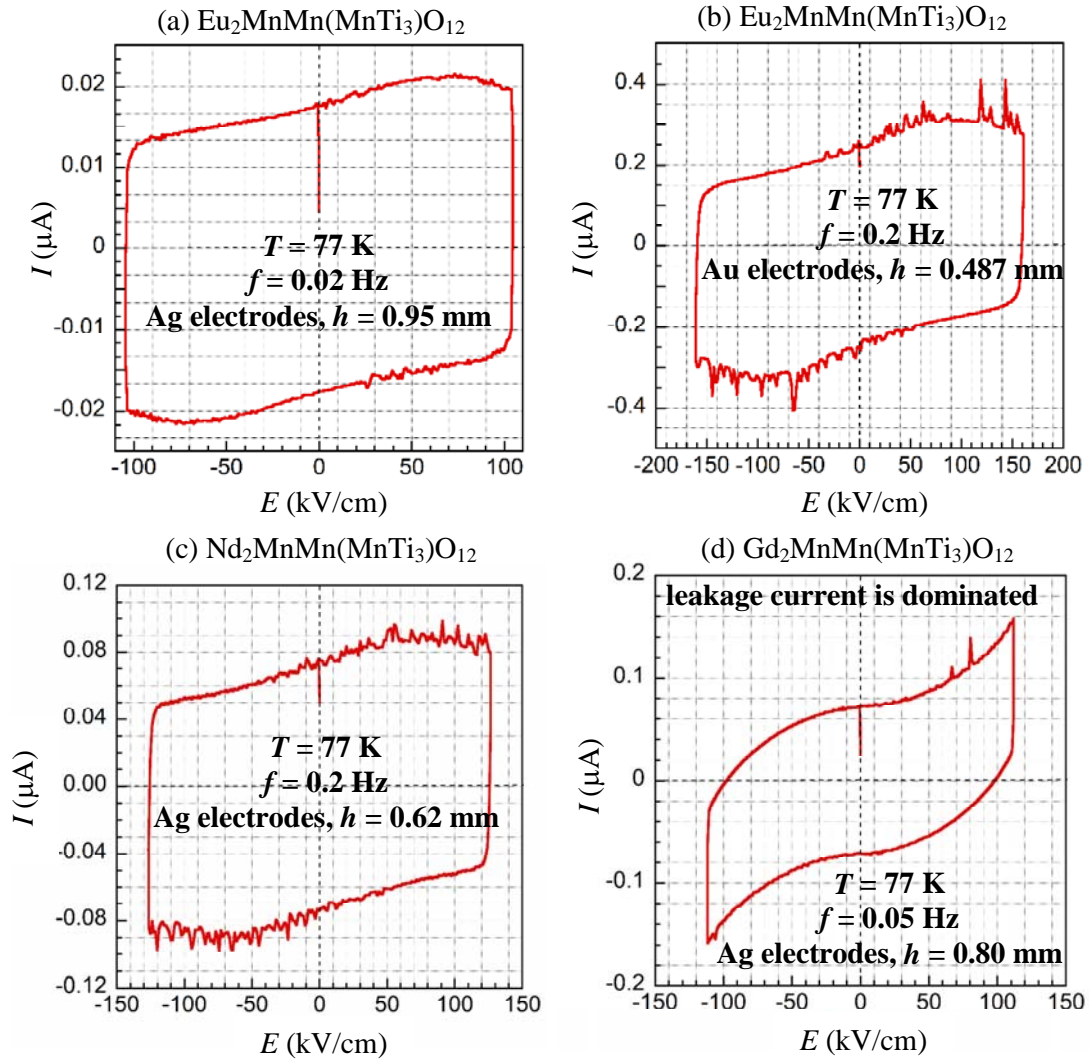

**Fig. S4.**  $I$ - $E$  hysteresis loops at  $T = 77 \text{ K}$  for (a, b)  $\text{Eu}_2\text{MnMn}(\text{MnTi}_3)\text{O}_{12}$ , (c)  $\text{Nd}_2\text{MnMn}(\text{MnTi}_3)\text{O}_{12}$  and (d)  $\text{Gd}_2\text{MnMn}(\text{MnTi}_3)\text{O}_{12}$ . Measurement frequencies, electrode materials and sample thickness are given on figures.
